# Supplementary material for: Globalization of agricultural pollution due to international trade
Source: Copernicus journal article supplement (doi:10.5194/hess-18-503-2014), 2014-02-10
Supplement: Supplementary file 1 [file hess-18-503-2014-supplement.pdf]

Appendix A: Commodities used in the calculation of total GWF for each country.

| <b>Commodity</b>       |
|------------------------|
| Wheat                  |
| Flour of Wheat         |
| Macaroni               |
| Bread                  |
| Rice, paddy            |
| Rice Husked            |
| Rice Milled            |
| Rice Broken            |
| Rice Flour             |
| Barley                 |
| Barley Pearled         |
| Barley Flour and Grits |
| Malt                   |
| Beer of Barley         |
| Maize                  |
| Flour of Maize         |
| Maize oil              |
| Rye                    |
| Flour of Rye           |
| Oats                   |
| Oats Rolled            |
| Millet                 |
| Sorghum                |
| Buckwheat              |
| Quinoa                 |
| Fonio                  |
| Triticale              |
| Canary seed            |
| Mixed grain            |
| Cereals, nes           |
| Potatoes               |
| Potatoes Flour         |
| Frozen Potatoes        |
| Potato Offals          |
| Tapioca of Potatoes    |

|                                  |
|----------------------------------|
| Sweet potatoes                   |
| Cassava                          |
| Flour of Cassava                 |
| Tapioca of Cassava               |
| Cassava Dried                    |
| Cassava Starch                   |
| Yautia (cocoyam)                 |
| Taro (cocoyam)                   |
| Yams                             |
| Roots and Tubers, nes            |
| Flour of Roots and Tubers        |
| Sugar cane                       |
| Sugar beet                       |
| Maple Sugar and Syrups           |
| Sugar crops, nes                 |
| Sugar Raw Centrifugal            |
| Sugar Refined                    |
| Molasses                         |
| Other Fructose and Syrup         |
| Sugar, nes                       |
| Sugar flavoured                  |
| Glucose and Dextrose             |
| Beans, dry                       |
| Broad beans, horse beans,<br>dry |
| Peas, dry                        |
| Chick peas                       |
| Cow peas, dry                    |
| Pigeon peas                      |
| Lentils                          |
| Bambara beans                    |
| Vetches                          |
| Lupins                           |
| Pulses, nes                      |
| Flour of Pulses                  |
| Brazil nuts, with shell          |
| Cashew nuts, with shell          |
| Chestnuts                        |

|                                   |
|-----------------------------------|
| Almonds, with shell               |
| Walnuts, with shell               |
| Pistachios                        |
| Kolanuts                          |
| Hazelnuts, with shell             |
| Arecanuts                         |
| Almonds Shelled                   |
| Walnuts Shelled                   |
| Hazelnuts Shelled                 |
| Nuts, nes                         |
| Prepared Nuts<br>(Exc.Groundnuts) |
| Soybeans                          |
| Soybean oil                       |
| Cake of Soybeans                  |
| Soya Sauce                        |
| Soya Paste                        |
| Soya curd                         |
| Groundnuts, with shell            |
| Groundnuts Shelled                |
| Groundnut oil                     |
| Coconuts                          |
| Copra                             |
| Coconut (copra) oil               |
| Palm kernels                      |
| Palm oil                          |
| Palm kernel oil                   |
| Cake of Palm Kernel               |
| Olives                            |
| Olive oil, virgin                 |
| Olives Preserved                  |
| Karite Nuts (Sheanuts)            |
| Butter of Karite Nuts             |
| Castor oil seed                   |
| Oil of Castor Beans               |
| Sunflower seed                    |
| Sunflower oil                     |
| Sunflower Cake                    |

|                                  |
|----------------------------------|
| Rapeseed                         |
| Rapeseed oil                     |
| Cake of Rapeseed                 |
| Olive Residues                   |
| Oil of Jojoba                    |
| Safflower seed                   |
| Sesame seed                      |
| Sesame oil                       |
| Mustard seed                     |
| Poppy seed                       |
| Melonseed                        |
| Cottonseed                       |
| Cottonseed oil                   |
| Cake of Cottonseed               |
| Linseed                          |
| Linseed oil                      |
| Cake of Linseed                  |
| Hempseed                         |
| Oilseeds, Nes                    |
| Oil of vegetable origin, nes     |
| Cabbages and other<br>brassicas  |
| Artichokes                       |
| Asparagus                        |
| Lettuce and chicory              |
| Spinach                          |
| Tomatoes                         |
| Tomatojuice Concentrated         |
| Juice of Tomatoes                |
| Paste of Tomatoes                |
| Tomato Peeled                    |
| Cauliflowers and broccoli        |
| Pumpkins, squash and<br>gourds   |
| Cucumbers and gherkins           |
| Eggplants (aubergines)           |
| Chillies and peppers, green      |
| Onions (inc. shallots),<br>green |

|                               |
|-------------------------------|
| Onions, dry                   |
| Garlic                        |
| Beans, green                  |
| Peas, green                   |
| String beans                  |
| Carrots and turnips           |
| Okra                          |
| Maize, green                  |
| Sweet Corn Frozen             |
| Veg.Prod.Fresh Or Dried       |
| Carobs                        |
| Vegetables fresh nes          |
| Juice of Vegetables Nes       |
| Vegetables Dehydrated         |
| Vegetables in Vinegar         |
| Vegetables Preserved Nes      |
| Vegetable Frozen              |
| Bananas                       |
| plantains                     |
| Oranges                       |
| Orange juice, single strength |
| Tangerines, mandarins, clem.  |
| Lemons and limes              |
| Grapefruit (inc. pomelos)     |
| Juice of Grapefruit           |
| Citrus fruit, nes             |
| Citrus juice, single strength |
| Apples                        |
| Cider Etc                     |
| Apple juice, single strength  |
| Pears                         |
| Apricots                      |
| Dry Apricots                  |
| Sour cherries                 |
| Cherries                      |
| Peaches and nectarines        |

|                                   |
|-----------------------------------|
| Plums and sloes                   |
| Plums Dried (Prunes)              |
| Stone fruit, nes                  |
| Strawberries                      |
| Raspberries                       |
| Gooseberries                      |
| Currants                          |
| Blueberries                       |
| Cranberries                       |
| Berries Nes                       |
| Grapes                            |
| Raisins                           |
| Grape Juice                       |
| Must of Grapes                    |
| Wine                              |
| Vermouths&Similar                 |
| Marc of Grapes                    |
| Watermelons                       |
| Other melons<br>(inc.cantaloupes) |
| Figs                              |
| Mangoes, mangosteens,<br>guavas   |
| Avocados                          |
| Pineapples                        |
| Juice of Pineapples               |
| Dates                             |
| Cashew apple                      |
| Kiwi fruit                        |
| Papayas                           |
| Fruit, tropical fresh nes         |
| Fruit Tropical Dried Nes          |
| Fruit Fresh Nes                   |
| Fruit Juice Nes                   |
| Coffee, green                     |
| Coffee Roasted                    |
| Cocoa beans                       |
| Cocoa Paste                       |

|                                |
|--------------------------------|
| Cocoahusks,Shell               |
| Cocoa Butter                   |
| Cocoapowder&Cake               |
| Chocolate Prsnes               |
| Tea                            |
| Hops                           |
| Pepper (Piper spp.)            |
| Chillies and peppers, dry      |
| Vanilla                        |
| Cinnamon (canella)             |
| Cloves                         |
| Nutmeg, mace and cardamoms     |
| Anise, badian, fennel, corian. |
| Ginger                         |
| Spices, nes                    |
| Peppermint                     |
| Cotton lint                    |
| Cotton Carded,Combed           |
| Cotton Waste                   |
| Cotton Linter                  |
| Flax fibre and tow             |
| Flax Tow Waste                 |
| Hemp Tow Waste                 |
| Jute                           |
| Other Bastfibres               |
| Ramie                          |
| Sisal                          |
| Agave Fibres Nes               |
| Manila Fibre (Abaca)           |
| Fibre Crops Nes                |
| Tobacco, unmanufactured        |
| Natural rubber                 |
| Cattle                         |
| Cattle meat                    |
| Offals of Cattle, Edible       |
| Meat-CattleBoneless(Beef&Veal) |

|                                 |
|---------------------------------|
| Meat of Beef,Drd,<br>Slted,Smkd |
| Sausage Beef&Veal               |
| Cow milk, whole, fresh          |
| Butter Cow Milk                 |
| Milk Skm of Cows                |
| Milk Whole Cond                 |
| Whey Condensed                  |
| Yoghurt                         |
| Butterm.,Curdl,Acid.Milk        |
| Milk Whole Dried                |
| Milk Skimmed Dry                |
| Cheese of Whole Cow Milk        |
| Whey Cheese                     |
| Processed Cheese                |
| Prod.of Nat.Milk Constit        |
| Cattle hides                    |
| Hides Wet Salted Cattle         |
| Hidesdry S.Cattle               |
| Sheep                           |
| Sheep meat                      |
| Offals of Sheep,Edible          |
| Cheese of Sheep Milk            |
| Skins Nes Sheep                 |
| Skins With Wool Sheep           |
| Goats                           |
| Goat meat                       |
| Offals of Goats, Edible         |
| Cheese of Goat Mlk              |
| Goatskins                       |
| Pigs                            |
| Pig meat                        |
| Offals of Pigs, Edible          |
| Fat of Pigs                     |
| Bacon and Ham                   |
| Sausages of Pig Meat            |
| Prep of Pig Meat                |
| Chickens                        |



|                               |
|-------------------------------|
| Hen eggs, in shell            |
| Eggs Liquid                   |
| Eggs Dried                    |
| Duck meat                     |
| Goose and guinea fowl<br>meat |
| Turkey meat                   |
| Other bird eggs,in shell      |
| Horses                        |
| Horse meat                    |
| Hair of Horses                |
| Hides Wet Salted Horses       |
| Hides Dry Slt Horses          |
| Hides Unsp Horse              |
| Asses                         |
| Mules                         |
| Offals other camelids         |
| Cocoon Unr.&Waste             |
| Hair Coarse Nes               |
| Food Prep Nes                 |
